# Supplementary material for: HELLS regulates transcription in T-cell lymphomas by reducing unscheduled R-loops and by facilitating RNAPII progression
Source: PubMed Central journal article supplement — Nucleic Acids Res. 2024 Apr 10;52(11):6171–82. doi: 10.1093/nar/gkae239 (PMC11194065; doi:10.1093/nar/gkae239), 2024-04-10

## Supplementary Methods

**Cell Culture.** The human T-cell lines MAC2A and CUTLL-1 were a kind gift from Dr. Giorgio Inghirami. The human Breast Implanted Associated (BIA)-ALCL cell lines TLBR-2 was a kind gift of Dr. Alain Epstein. HEK-293T cells was a kind gift of Dr. Ciarrocchi. Cell identity was determined yearly. All cell lines were genotyped and routinely tested for Mycoplasma contamination. Cell lines were cultured in RPMI-1640 medium (Gibco) supplemented with 10% FBS at 37 °C in an atmosphere of 5% CO<sub>2</sub>. TLBR-2 cells were supplemented with IL2 (20U/ml). Doxycycline hyclate was purchased from Sigma and dissolved in H<sub>2</sub>O.

**Plasmids and viral infections.** pLKO Tet-On vector expressing shRNA against HELLS was generated by cloning synthetic double-stranded oligonucleotides into the pLKO Tet-On vector (Addgene #21915). Vectors were packaged into lentiviral particles HEK 293T-cell line and used for infection of low passages MAC2A, CUTLL-1, TLBR-2, and HEK 293T cells at a multiplicity of infection. Cells were selected with 0.5 µg/ml (for MAC2A), 0.75 µg/ml (CUTLL-1), or 1 µg/ml (TLBR-2 and HEK 293T) of puromycin for 3 days.

**Western blot.** Western blot analysis was performed using standard techniques. The primary antibodies were: HELLS (Rabbit mAb#7998, Cell Signaling Technology), RNase H1 (H-4) (sc-376326, Mouse, Santa Cruz Biotechnology), Phospho-Histone H2A.X (Ser139) (Mouse mAb#80312, Cell Signaling Technology), β-Actin (AC-15, Mouse, Sigma-Aldrich), and GAPDH (Rabbit mAb #2118, Cell Signaling Technology). All secondary antibodies (rabbit and mouse) were HRPconjugated (GE Healthcare) and diluted 1:3000.

**RNA extraction and quantitative PCR (RT-qPCR).** Total RNA was extracted by TRIzol (Thermo Fisher Scientific) according to the manufacturer's instructions. One microgram of total RNA was retrotranscribed using the iScript cDNA kit, (Biorad). The amplified transcript level of each specific gene was normalized on the CHMP2A housekeeping gene.  $\Delta\Delta C_t$  quantification method was used for RT-qPCR analyses. The list of primers used is provided in **supplementary table 2**.

### **Immunofluorescence (IF)**

For  $\gamma$ H2AX and  $\gamma$ H2AX/ser2P-RNAPII staining, cells were spotted on glass slides using Cytospin (Thermo Scientific), fixed with 4% paraformaldehyde for 15 min, and permeabilized with 0.1% Triton X-100 buffer (0.5% Triton X-100, 20mM Hepes-KOH pH 7.9, 50mM NaCl, 3mM MgCl<sub>2</sub>, 300mM Sucrose) for 10 min and washed twice. Dots were blocked in PBS-BSA solution (1mg/ml BSA, 2% FBS, 0.1% Triton X-100, 1mM EDTA) for 30 min at room temperature and incubated with  $\gamma$ H2AX primary antibody (sc-517348, Mouse, 1:200, Santa Cruz Biotechnology, Inc) for 1 hour at RT. Dots were washed in PBS three times and stained with secondary antibodies for 45 min (Cat # A-11001, Anti-Mouse Alexa Fluor™ 488, 1:1000, Thermo Scientific). Dots were then incubated with Phospho-Rpb1 CTD (Ser2) antibody (E1Z3G, Rabbit mAb #13499, 1:200 Cell Signaling Technology) for 1 hour at RT, washed in PBS three times and stained with secondary antibodies for 45 min (Cat # A-11012 Anti-Rabbit Alexa Fluor™ 594, 1:1000, Thermo Scientific). Nuclei were stained with DAPI.

For R-loops staining, cells were fixed with ice-cold methanol for 10 min at -20°C, permeabilized with acetone for 1 min at -20°C, and washed twice for 5 min with 4x SSC (pH 7). Dots were blocked in 5% BSA/0.1% Tween-20/4x SSC (pH 7) for 1 hr at RT. Dots were incubated with anti-DNA-RNA Hybrid primary antibody (clone S9.6, MABE 1095, 1:300, Merck) for 1 hour and

30 min in blocking solution, washed in 4X SSC solution (pH=7, Cat.#15557044, Thermo Scientific) for three times and stained with Alexa Fluor™ 488 secondary antibody for 45 min. For R-loops/  $\gamma$ H2AX staining, dots were then incubated with  $\gamma$ H2AX primary antibody (NB100-384, Rabbit, 1:200, NovusBio) for 2 hours in blocking solution, washed in 4X SSC solution (pH=7, Cat.#15557044, Thermo Scientific) for three times and stained with Alexa Fluor™ 594 secondary antibody for 45 min (Cat # A-11012, 1:2000, Thermo Scientific). For R-loops/ Ser2P-RNAPII staining, dots were then incubated with primary antibody Phospho-Rpb1 CTD (Ser2) antibody (E1Z3G, Rabbit mAb #13499, 1:200 Cell Signaling Technology) for 1 hour and 30 min in blocking solution, washed in 4X SSC solution (pH=7, Cat. #15557044, Thermo Scientific) for three times and stained with Alexa Fluor™ 594 secondary antibody for 45 min (Cat # A-11012, 1:2000, Thermo Scientific). Nuclei were stained with DAPI.

For RNASE H control, cells were treated with RNaseH1 (MO297L, New England Biolabs) for 2 hours at 37°, washed twice, and incubated in 3% BSA/0.1% Tween-20/4x SSC blocking solution overnight before R-loops staining. Immunofluorescences were detected with Nikon Eclipse (Ni) microscope using 60X.

### **Fluorescent Intensity Measurement**

The nuclear R-loops signal was quantified in at least 1000 cells using NIH ImageJ software and as previously described(1).

Nuclear  $\gamma$ H2AX foci were quantitated by manually counting immunofluorescence images, analyzing 500 cells for each independent experiment (n=3).

### **Colocalization signal measurement**

To measure the colocalization between the fluorescence signal of Phospho-Rpb1 CTD (Ser2) and that of the R-Loops, the ImageJ software was used, analyzing the percentage of colocalization area in relation to the total fluorescence area of the cell, comparing the Control vs Doxycyclin treatments conditions. Furthermore, a correlation analysis between the two fluorescence signals was conducted using the ImageJ “Colocalization-Finder” tool and expressing the correlation based on the Pearson Coefficient. In total, 10 fields were considered per biological replicate (approximately 30 nuclei per field). Total replicates = 3.

### **ATAC-seq**

ATAC-seq on CTR and HELLS-KD cells was performed as described by Grandi et al(2). Briefly, pellets from 50,000 TLBR2 CTR/HELLS-KD cells (viability>95%) were resuspended in 50 ul of ATAC-seq Lysis Buffer (10 mM TRIS-HCl pH 7.5, 10 mM NaCl, 10 mM MgCl<sub>2</sub>, 0,1% NP40, 0.1% Tween-20, 0,01% Digitonin) and incubated 3 min in ice. Lysates were diluted with 1 ml of ATAC-seq Wash Buffer (10 mM TRIS-HCl pH 7.5, 10 mM NaCl, 10 mM MgCl<sub>2</sub>,0.1% Tween-20) and spun 500g, 10 min, 4°C. Tagmentation was performed with Illumina Tagment DNA (TD) TDE1 Enzyme and Buffer (Illumina) using 2.5 ul/sample of TDE1 TD enzyme (Tn5 Transposase). The nuclear pellet was resuspended in 50 ul of Transposition Mix (TD buffer, TDE1 TD enzyme, 0.01% digitonin, 0.1% Tween-20 in PBS) and incubated 37°C, 30 min while shaking at 1000 rpm. DNA was purified using DNA Clean and Concentrator-5 KIT (Zymo Research) and eluted in 21 ul of Elution Buffer. PCR for fragmented DNA amplification and barcoding was performed with NEBNext Ultra II Q5 2X Master Mix (New England Biolabs) with sample-specific adapters. Samples were quantified with NEBNext Library Quantification kit (New England Biolabs) and amplified for an additional 7 cycles. Final libraries were purified with

DNA Clean and Concentrator-5 KIT and sequenced on NextSeq500 (Illumina) to generate paired-end 2 × 75 bp reads.

### Statistical analysis

Statistical analyses were performed using GraphPad Prism Software (GraphPad). Statistical significance was determined using Student's *t*-test. Each experiment was replicated multiple times (>2 up to 6). All analyses were performed using R software version 4.1.3.

### Supplementary Figure Legends

**Supplementary Figure 1.** (A) Pie chart shows the genomic annotation of HELLS. (B) Example of a ChIP-seq IGV browser view of HELLS binding (bam), HELLS peak (bed), the input control and RNA-seq tracks representative of direct (PLXNB2 and RAD23A) and indirect (TMEM30A) HELLS targets. Centromeric region was chosen as positive control of HELLS binding. The *y*-axis represents the normalized tag densities relative to hg19 genomic coordinates. (C) Western blots show the level of HELLS in T-cell lymphoma cells before (CTR) and after doxycycline (DOX) treatment (48 hours) to induce the shRNA against HELLS. (D) RT-qPCR validation of HELLS peaks in HDGs in TLBR-2 HELLS<sup>KD</sup> cells after doxycycline treatment (48 hours). Each data represents the mean ± SEM (*n* = 2). Two-tailed *t*-test. \**p* < 0.05; \*\**p* < 0.01. (E) Western blots show the level of HELLS in T-cell lymphoma cells before (CTR) and after doxycycline (DOX) treatment (48 hours) to induce the shRNA against HELLS. (F) RT-qPCR validation of significantly deregulated HDGs in TLBR-2 and MAC2A HELLS<sup>KD</sup> cells after doxycycline treatment (48 hours). Each data represents the mean ± SEM (*n* = 2). Two-tailed *t*-test. \**p* < 0.05; \*\**p* < 0.01. (G) The plot shows the expression value of HELLS in ALK<sup>-</sup> ALCL patients compared

to ALK<sup>+</sup> ALCL patients. The comparison was considered significant for  $p \leq 0.05$  (\*). **(H)** Correlation plots show the expression values for genes from ALK<sup>-</sup> ALCL patients compared to ALK<sup>+</sup> ALCL patients. For each gene pair, the expression HELLS is on the x-axis, while HDGs is on the y-axis. For visualization purposes, a linear model was fitted to the data in each comparison, with the blue and red lines representing 95% confidence intervals. This visualization was made using a DGCA wrapper function to the ggplot2 R package.

**Supplementary Figure 2.** The pie charts show the distribution of HELLS peaks at HDGs **(A)** and the genomic distribution of H3K4me3, H3K9me3, and RNAPII peaks in TLBR-2 HELLS<sup>KD</sup> **(B)**. **(C)** Example of a ChIP-seq IGV browser view of HELLS binding (in CTR condition) and H3K9me3 enrichment in a pericentromeric gene. The y-axis represents the normalized tag densities relative to hg19 genomic coordinates. **(D)** Example of a ChIP-seq IGV browser view of HELLS binding (in CTR condition), H3K4me3 profile, RNAPII occupancy and mRNA expression (RNA-seq track) in representative HDGs (RAD23A and CD274) and in a HELLS indirect gene (TMEM30A which is modulated in RNA-seq after HELLS KD without HELLS binding). The y-axis represents the normalized tag densities relative to hg19 genomic coordinates. **(E)** The Venn diagrams show ATAC-seq peaks global (left) and local (at HDGs, right) overlaps between CTR and DOX conditions in TLBR-2 cells. **(F)** Violin and box plots of the absolute value of the log<sub>2</sub> shrunken fold-change (y-axis), obtained by differential enrichment analysis (TLBR-2 HELLS<sup>KD</sup> versus control, DESeq2 R package), in HELLS not-target genes (no.targets), 195 HDGs with lack of RNAPII loading (group I) and 272 HDGs with RNAPII stalled (group II), grouped by CHIPseeker (R package) categories (panels). On top, p-values associated with beta coefficients estimated by linear regression model with log<sub>2</sub> shrunken fold-change as the response variable, and gene groups as the independent variable. **(G)** ChIP-RT-

qPCR detection of ser5P-RNAPII normalized on total RNAPII levels for HDGs in TLBR-2 cell line. Data are representative of five independent experiments and are shown as the mean  $\pm$  SEM (technical triplicates). Two-tailed *t*-test. \**p* < 0.05; \*\**p* < 0.01. CHIP-RT-qPCR detection of total RNAPII (H), ser5P-RNAPII (I) and ser2P-RNAPII (J) on control regions TLBR-2 cell line. 3' region of  $\beta$ -actin was used as CTR<sup>+</sup> for Ser2P-RNAPII whereas the first exon of  $\beta$ -actin was used as CTR<sup>+</sup> for Ser5P-RNAPII and total RNAPII. A non-coding region of RUNX2 was used as CTR<sup>-</sup>. Each data represents the mean  $\pm$  SEM (*n*=3).

**Supplementary Figure 3.** (A) Representative immunofluorescences showing the absence of R-loops in lymphoma cells in the absence (CTR) or presence (DOX) of doxycycline (48 hours). Cells were stained with S9.6 antibody and DAPI. The white scale bar represents 10  $\mu$ m. For specific quantification of nuclear S9.6 staining, regions of interest were overlaid on the DAPI signal and selectively quantified to exclude cytoplasmic S9.6 signal and nucleolar S9.6 signal (*n* = 3 independent experiments). Relative bar plots indicate the intensity of S9.6-stained cells per nucleus (*n*=1000 cells). Each data represents the mean  $\pm$  SEM (*n*= 3). Two-tailed *t*-test \**p* < 0.05; \*\**p* < 0.01 relative to CTR. (B) Qualitative analysis of the colocalization signal. On the left, representative scatter plots retrieved using the Colocalization Finder plugin on Fiji to analyze the intensity correlation between R-loops and ser2P-RNAPII, as described in Materials and Methods. Red (ser2P-RNAPII) and green (R-loops) signals were plotted on the X and the Y axes respectively. The Pearson's Coefficient is indicated in the upper right part of the plot. On the right, quantification analysis of the percentage of colocalization between red (ser2P-RNAPII) and green (R-loops) signals. Statistical analyses were performed with *t*-test to compare the data with two variables. Statistical significance is specified with asterisks (\**p* < 0.05, \*\**p* < 0.01, \*\*\**p* < 0.001, \*\*\*\**p* < 0.0001). (C) Representative DRIP-qPCR signal values at

the RPL13A (positive control) and SNRPN (negative control) loci in TLBR-2 control and HELLS<sup>KD</sup> cells w/o pretreatment with RNase H. **(D)** Western blot shows the downregulation of HELLS and the up-regulation of  $\gamma$ H2AX in HEK-293T HELLS<sup>KD</sup> cells after treatment with doxycycline (DOX, 48 hours).  $\beta$ -actin was used as a loading control. **(E)** Western blot shows time course expression of RNaseH1 isoforms in HEK-293T cells.  $\beta$ -actin was used as a loading control. **(F)** Western blot shows changes HELLS and  $\gamma$ H2AX 293T HELLS<sup>KD</sup> cells overexpressing RNaseH1 isoforms w/o treatment with doxycycline (DOX, 48 hours). **(G)** Representative IF images of R-loops and  $\gamma$ H2AX intensities in HEK293T HELLS<sup>KD</sup> cells. w/o treatment with doxycycline (DOX, 48 hours). The white scale bar represents 10  $\mu$ m. **(H)** Representative ChIP-qPCR signal values at the negative control loci in TLBR-2 control and HELLS<sup>KD</sup> cells. **(I)** The effects of doxycycline on NHEJ, MMEJ, and HR efficiency were examined in HEK-293T cells using the GFP reporter assay.

**Supplementary Figure 4.** Graphs showing the relative cells growth of TLBR-2 HELLS<sup>KD</sup> **(A)**, MAC2A HELLS<sup>KD</sup> **(B)**, and CUTLL1 HELLS<sup>KD</sup> **(C)** cells treated with different concentrations of chemotherapeutic drugs (Gem: gemcitabine, ETP: etoposide, CISP: cisplatin, CPA: cyclophosphamide) for 96 hours. **(D)** Western blot shows the downregulation of HELLS in CUTLL1 HELLS<sup>KD</sup> cells after treatment with doxycycline (DOX, 48 hours). GAPDH was used as a loading control. **(E)** RT-qPCR validation of HELLS and significantly deregulated HDGs genes in CUTLL1 HELLS<sup>KD</sup> cells after doxycycline treatment (48 hours). Each data represents the mean  $\pm$  SEM ( $n = 3$ ). Two-tailed  $t$ -test.  $**p < 0.01$ . **(F)** The graph shows the growth of CUTLL1 HELLS<sup>KD</sup> cells after doxycycline treatment (48 hours). Each data represents the mean  $\pm$  SEM ( $n = 3$ ). Two-tailed  $t$ -test.  $**p < 0.01$ . **(G)** Representative immunofluorescences showing



the presence of  $\gamma$ H2AX in CUTLL1 HELLS<sup>KD</sup> cells in the absence (CTR) or presence (DOX) of doxycycline (48 hours). Cells were stained with  $\gamma$ H2AX antibody and DAPI. The white scale bar represents 10  $\mu$ m. **(H)** The table shows the percentage of lymphoma cells proliferation reduction after treatment with doxycycline alone (DOX) or in combination with drugs (GEM: gemcitabine, ETP: etoposide, CISP: cisplatin, CPA: cyclophosphamide) at 96 hours.

**Supplementary Table 1.** List of genes analyzed by nCounter platform

| <b>Gene</b> | <b>Type</b>              |
|-------------|--------------------------|
| ACTG1       | Coding gene              |
| BATF3       | Coding gene              |
| BIRC5       | Coding gene              |
| CDC42SE2    | Coding gene              |
| CDC6        | Coding gene              |
| CENPF       | Coding gene              |
| CHMP2A      | Coding gene/housekeeping |
| COG7        | Coding gene/housekeeping |
| DNAJC14     | Coding gene/housekeeping |
| DOCK3       | Coding gene              |
| ECT2        | Coding gene              |
| EIF2B4      | Coding gene/housekeeping |
| EMC7        | Coding gene/housekeeping |
| ERCC3       | Coding gene/housekeeping |
| EXO1        | Coding gene              |
| FLNA        | Coding gene              |
| FSCN1       | Coding gene              |
| G6PD        | Coding gene/housekeeping |
| GUSB        | Coding gene/housekeeping |
| HELLS       | Coding gene              |
| HMGA1       | Coding gene              |
| HPRT1       | Coding gene/housekeeping |
| KCNMA1      | Coding gene              |
| KCNQ1OT1    | Coding gene              |
| KDM4C       | Coding gene              |

|         |                          |
|---------|--------------------------|
| KLHL21  | Coding gene              |
| KMT2C   | Coding gene              |
| MCM5    | Coding gene              |
| MHY9    | Coding gene              |
| MRPS5   | Coding gene/housekeeping |
| MSH6    | Coding gene              |
| MTMR14  | Coding gene/housekeeping |
| NCOR2   | Coding gene              |
| POLD1   | Coding gene              |
| PPIA    | Coding gene/housekeeping |
| PPIF    | Coding gene              |
| REEP5   | Coding gene/housekeeping |
| RHOA    | Coding gene              |
| RICTOR  | Coding gene              |
| SEPTIN5 | Coding gene              |
| SF3A3   | Coding gene/housekeeping |
| STAT5A  | Coding gene              |
| SUN2    | Coding gene              |
| TLK2    | Coding gene/housekeeping |
| TNFRSF8 | Coding gene              |
| TRIO    | Coding gene              |
| USP22   | Coding gene              |
| XRCC6   | Coding gene              |

**Supplementary Table 2.** List of primers used in this study

| <b>Primers ChIP</b> |                           |                       |
|---------------------|---------------------------|-----------------------|
|                     | Forward                   | Reverse               |
| MCM5_1              | CACCGCCTCTTGTTTTTCCC      | CTCCCACTAGCCTCACCTCT  |
| MCM5_2              | CTGTTCTGGCCGTTTGTTC       | CCGAAGCTGTCGCTGTAGAA  |
| MCM5_3              | TTTCTGTCCCACGAAGGGGA      | TTCCCACTCCATGAAACGCC  |
| MCM5_4              | TGACCTGTCACCTCCATCGT      | AAACCGGAGCACTCAAGTCA  |
| EXO1_1              | TGTAGGCAAGTTACCCGTGT<br>T | GCCGATTGCGGTTGGAGAAA  |
| EXO1_2              | GGTTTCTCCAACCGCAATCG      | AAGGGAACCCACCCATTAGC  |
| EXO1_3              | CGAGGATATTTGCCTGGCCC      | CTCACTCCGAGGAAAACGGA  |
| EXO1_4              | AATGCAGACTGCTGCAAAGC      | GCCTCATTCCCAAACAGGGA  |
| RHOA_1              | CAGGCAACGAATCCGAGTCC      | TTCGTCTCCGAGTTTGCAGAC |

|                                       |                             |                               |
|---------------------------------------|-----------------------------|-------------------------------|
| RHOA_2                                | ACAGCGACTTCGACTAAGCA        | TGGGGTCTGTTTTGAGTGGA          |
| RHOA_3                                | CTCGCAACAGTCCTCCTGTA        | TAGCAGTGCGACTGACGTTG          |
| RHOA_4                                | TCTTCCCACGTCTAGCTTGC        | GCAAACAGGATTGGCGCTTT          |
| RHOA_5                                | CTCTGGGAGGGAACCTGGAT<br>A   | CACGCCTGAGGCAATTAGACA         |
| ACTB ( $\beta$ -<br>actin)_downstream | GTCCCTTCCCACCTCCTCAA        | GGCCCTTCTATGTCTCCCCA          |
| ACTB_exon1                            | GCAAAGGCGAGGCTCTGT          | CCCTATAAAACCCAGCGGCG          |
| RUNX2_upstream                        | TCTCAAGGTGCCTGTCTGC         | TGAAGTTTGGCCTCTGGTCT          |
| MCM5_peak1                            | TGAGCGTGGAGTTCTTGTC         | CCGAGAACTCCTGTCCCAC           |
| MCM5_peak2                            | GTCACACCTGGTGAAGATCC<br>C   | TGCGGCACTGGATAGAGATG          |
| CDC42SE2_peak1                        | AGGAGCTCTTTTAGGGCAGG        | CCCAGAATTGCATATCCAGCC         |
| CDC42SE2_peak2                        | TGAGCAGTGGCTGAGACAAG        | ACCAGGCACAGTTCCAAGAA          |
| XRCC6_peak1                           | CCTTGCTAGAGGGTTAGCGT        | GAGCGTGGTCTCGAGTCTG           |
| MSH6_peak1                            | TCCGGTCTTCCTTCTGTTCC        | AGTTATTCAAAGAAGATGCATT<br>GGT |
| STAT5A_peak1                          | TTTGGGATTTCCAGAGCCCG        | CGGGGCGGGTCAGAATAG            |
| BATF3_peak1                           | GTGGGTGATGGACCCTTGAT<br>T   | CGTGCGCAAGATACTCA             |
| BATF3_peak2                           | GGAGGTGATAATAAGCAGGC<br>TCT | ACAAGGCTGAGCAATCATTTC<br>G    |
| TNFRSF8_peak1                         | TGGTTTTAACAGCACCAGCG        | CAGAACAGACCGATCGGAGA          |
| TNFRSF8_peak2                         | AAGGAAGTACCAGGCTCCCA        | CGATCCACTCACCAGCAAGG          |
| neg_CTR_HELLS                         | CAGGACCCACAGTGTGTC          | GCGTTTTGAGCCCTCTATGAG         |
| neg_CTR_DSB                           | ATGTTCCCAAGCAGTGTTCC        | CAGAAGGAGCCCAGAGATTTT         |
|                                       |                             |                               |
| <b>Primer qRT-PCR</b>                 |                             |                               |
|                                       | Foward                      | Reverse                       |
| XRCC6                                 | CTTCCCTGCGCCAAAGTGAG        | CAGCCCAAGGTTTCCTCATA          |
| HELLS                                 | AGCGGTTGTGAGGAGTTAGC        | CATGCCTGGACACTCACCC           |
| YEATS2                                | GCCACAGTATCCGGACTGTT        | GCACCCCTCCAGATGTGTTT          |
| CDC6                                  | AAGCTGTCTCGGGCATTGAA        | GCTGAGAGGCAGGGCTTTTA          |
| MCM5                                  | AGAGGCTCCCTGATGGACTT        | TCCCAGACGTGTATACCCCA          |
| EXO1                                  | AGCTACGCTGGGCAATATGT        | ACTTCTTGAATGGGCAGGCA          |
| HUWE1                                 | AGGCTGAAACCGACTCAGTG        | GATCCGCCATCCCTCTCAAG          |
| JAK2                                  | TACCTCTTTGCTCAGTGGCG        | AACACTGCCATCCCAAGACA          |
| UPF1                                  | AATTTGGTTAAGAGACATGC<br>GG  | TCAGGGACCTTGATGACGTG          |
| POLK                                  | GCACAAAGGAGAAGTGTGAC<br>AG  | CCCCTTCGTGGCTTCCATTA          |
| ATM                                   | GCGTGGCTAACGGAGAAAAG        | TGTGATGTATGCCTCACTGC          |

|                  |                           |                                                    |
|------------------|---------------------------|----------------------------------------------------|
| KDM4C            | ACAGCCTCTGACATGCGATT      | AAACCTGGAGCTCAGCACTC                               |
| NABP1            | AGAACGGGGCAGTTAGTACG      | GAACCACTCCGCACACCAA                                |
| RFWD3            | GGTAACTACCGAGTCTTCGG<br>C | TCGGCATGATTAACTGCACC                               |
| ATRX             | TGATTGTACAGCCAGAGCCA<br>G | CCCATCTTCTCCGCGTTTTT<br>GAGGTGCATCATCATCATCCC<br>A |
| POLD1            | AAACGCTGTTTGAAGCGGCA      |                                                    |
| MSH6             | TGCTTTTAGGAGCTCCGTCC      | CTGTACAGGGTGCTCTGTGC                               |
| NCOR2            | GCCTTACATGCCTCTGGGAA      | CTCGGTGTCTGAGCTGTTGT                               |
| HMGA1            | CTAATTGGGACTCCGAGCCG      | GTAGCAAATGCGGATGCCTT                               |
| USP22            | CATGACCCCTTTCATGGCCT      | TTGTTGAGACTGTCCGTGGG                               |
| RAD23A           | AACTACATCCAGGTGACGCC      | CGCGAAATAGGCCTGGATGA                               |
| RHOA             | GGACTTAAGCGTCTGGCTC       | AGTGCCACCCATGAGAACTG<br>CATGTACCTGATTCATGGACG<br>G |
| KLHL21           | TTTGTGTCAGGGATGACTCCGC    |                                                    |
| CDC42SE2         | GCGACGATAGGGCCAGATTT      | TGCATACAGATGACCGCAGA                               |
| STAT5A           | GTCACGCAGGACACAGAGAA      | AACCAGGCCTCCAGAGACA                                |
| CD30 (TNFRSF8)   | GCTTGTGGATTCCAGACCCA      | GTGGCTGGCTCATTAAACCCT                              |
| CHMP2A           | ATGGACCTATTGTTCCGGGCG     | TCTCTAGTTTCTGTGCTCGC                               |
|                  |                           |                                                    |
| <b>DRIP-qPCR</b> |                           |                                                    |
|                  | Foward                    | Reverse                                            |
| SNRPN            | GCCAAATGAGTGAGGATGGT      | TCCTCTCTGCCTGACTCCAT                               |
| RPL13A           | AGGTGCCTTGCTCACAGAGT      | GGTTGCATTGCCCTCATTAC                               |

**Supplementary Table 3.** Number of peaks and corresponding genes for each ChIP-seq condition in TLBR-2 HELLS<sup>KD</sup> cell line

| Sample  |      | # Peaks | # Genes |
|---------|------|---------|---------|
| RNAPII  | CTR  | 76005   | 15779   |
|         | DOXI | 80250   | 16559   |
| H3K4me3 | CTR  | 24080   | 14140   |
|         | DOXI | 21377   | 13484   |
| H3K9me3 | CTR  | 651     | 84      |
|         | DOXI | 243     | 30      |

## Supplementary References

1. Wahba,L., Amon,J.D., Koshland,D. and Vuica-Ross,M. (2011) RNase H and Multiple RNA Biogenesis Factors Cooperate to Prevent RNA:DNA Hybrids from Generating Genome Instability. *Molecular Cell*, **44**, 978–988.
2. Grandi,F.C., Modi,H., Kampman,L. and Corces,M.R. (2022) Chromatin accessibility profiling by ATAC-seq. *Nat Protoc*, **17**, 1518–1552.

# Supplementary Figure S1

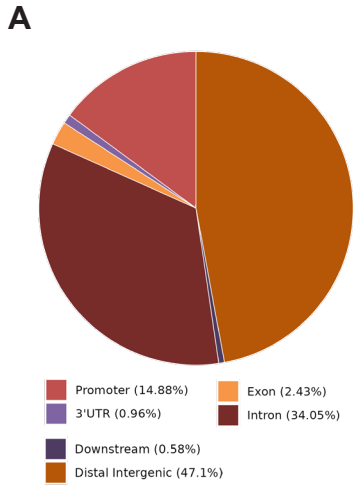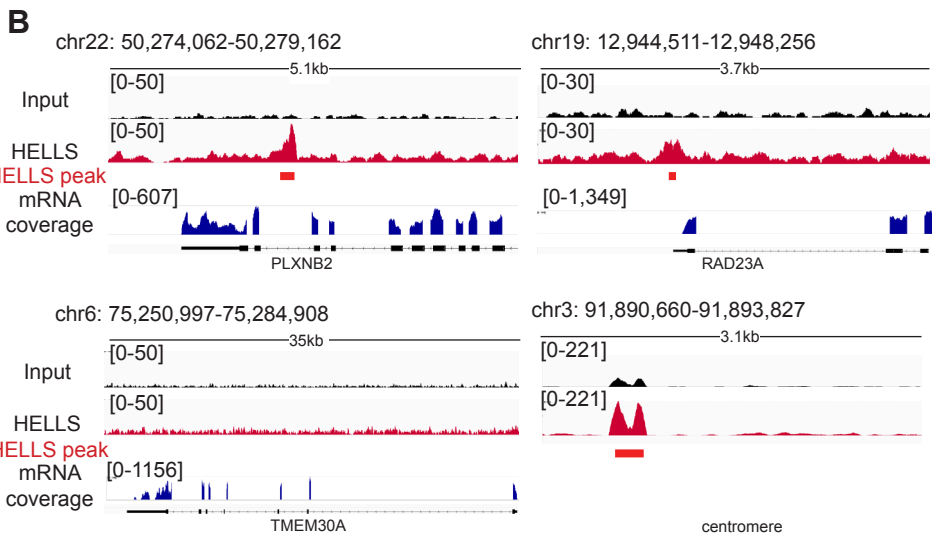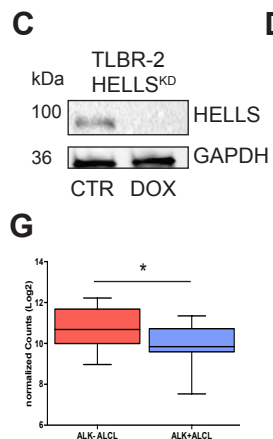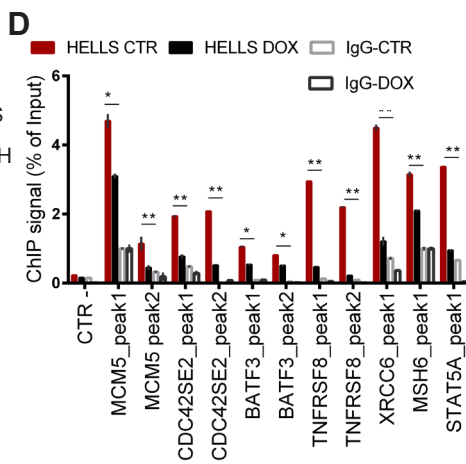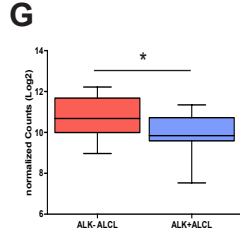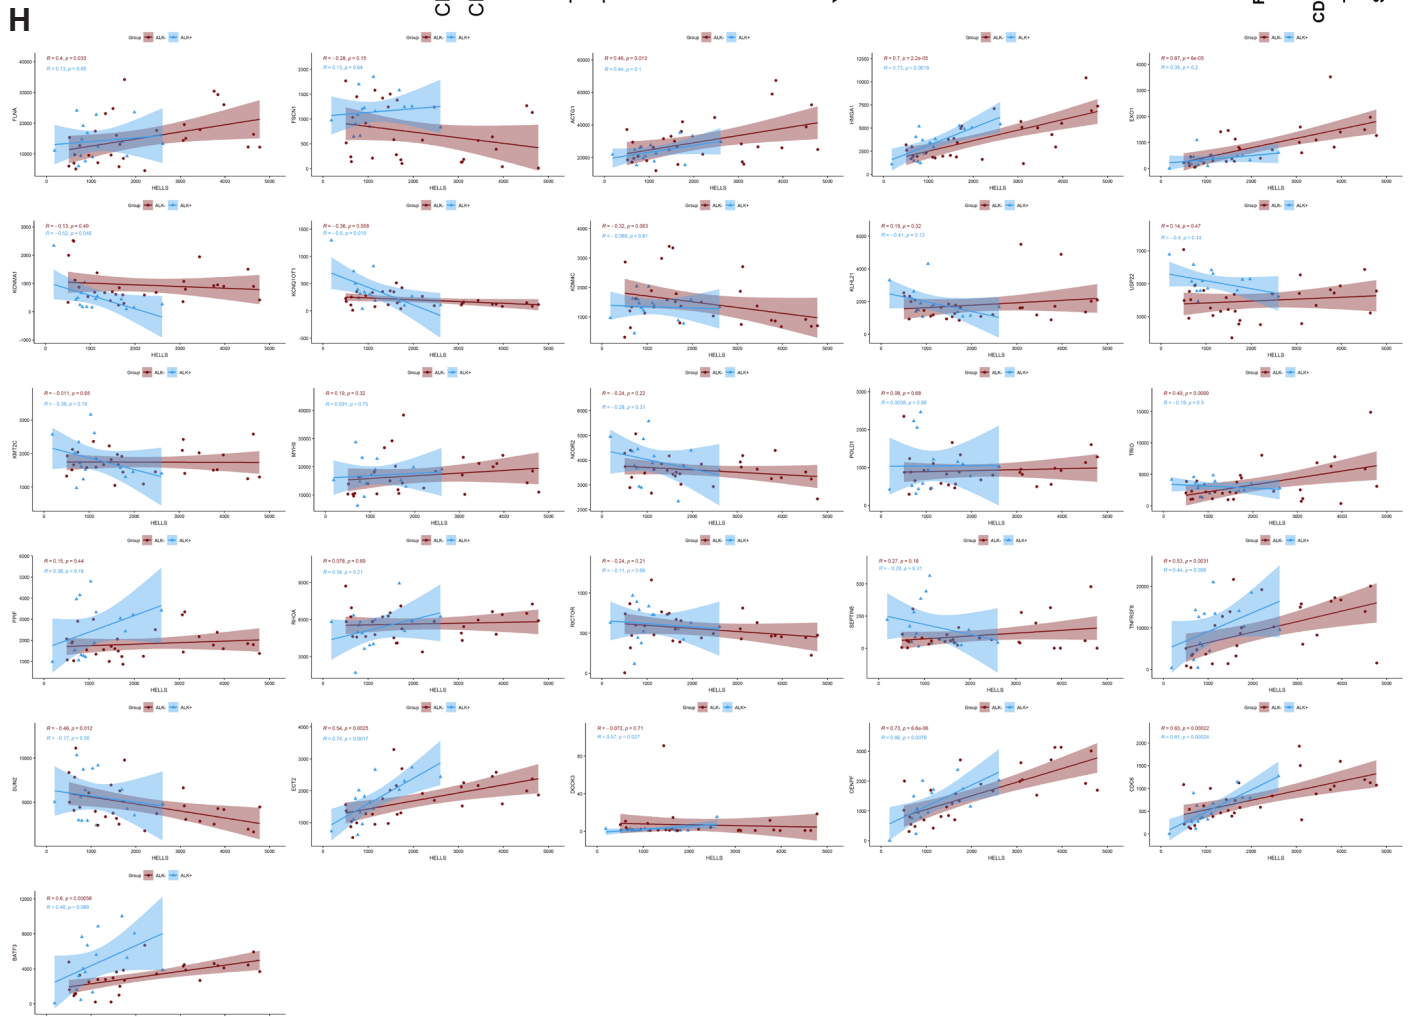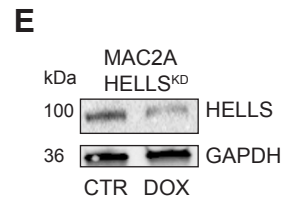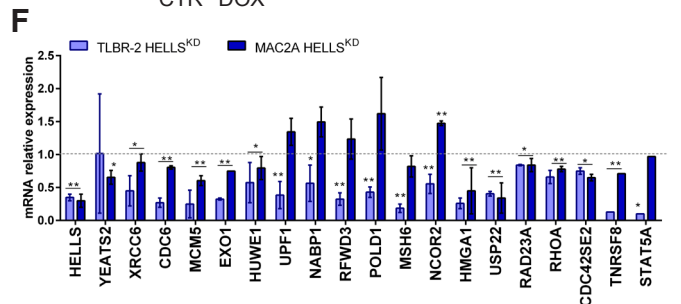

# Supplementary Figure S2

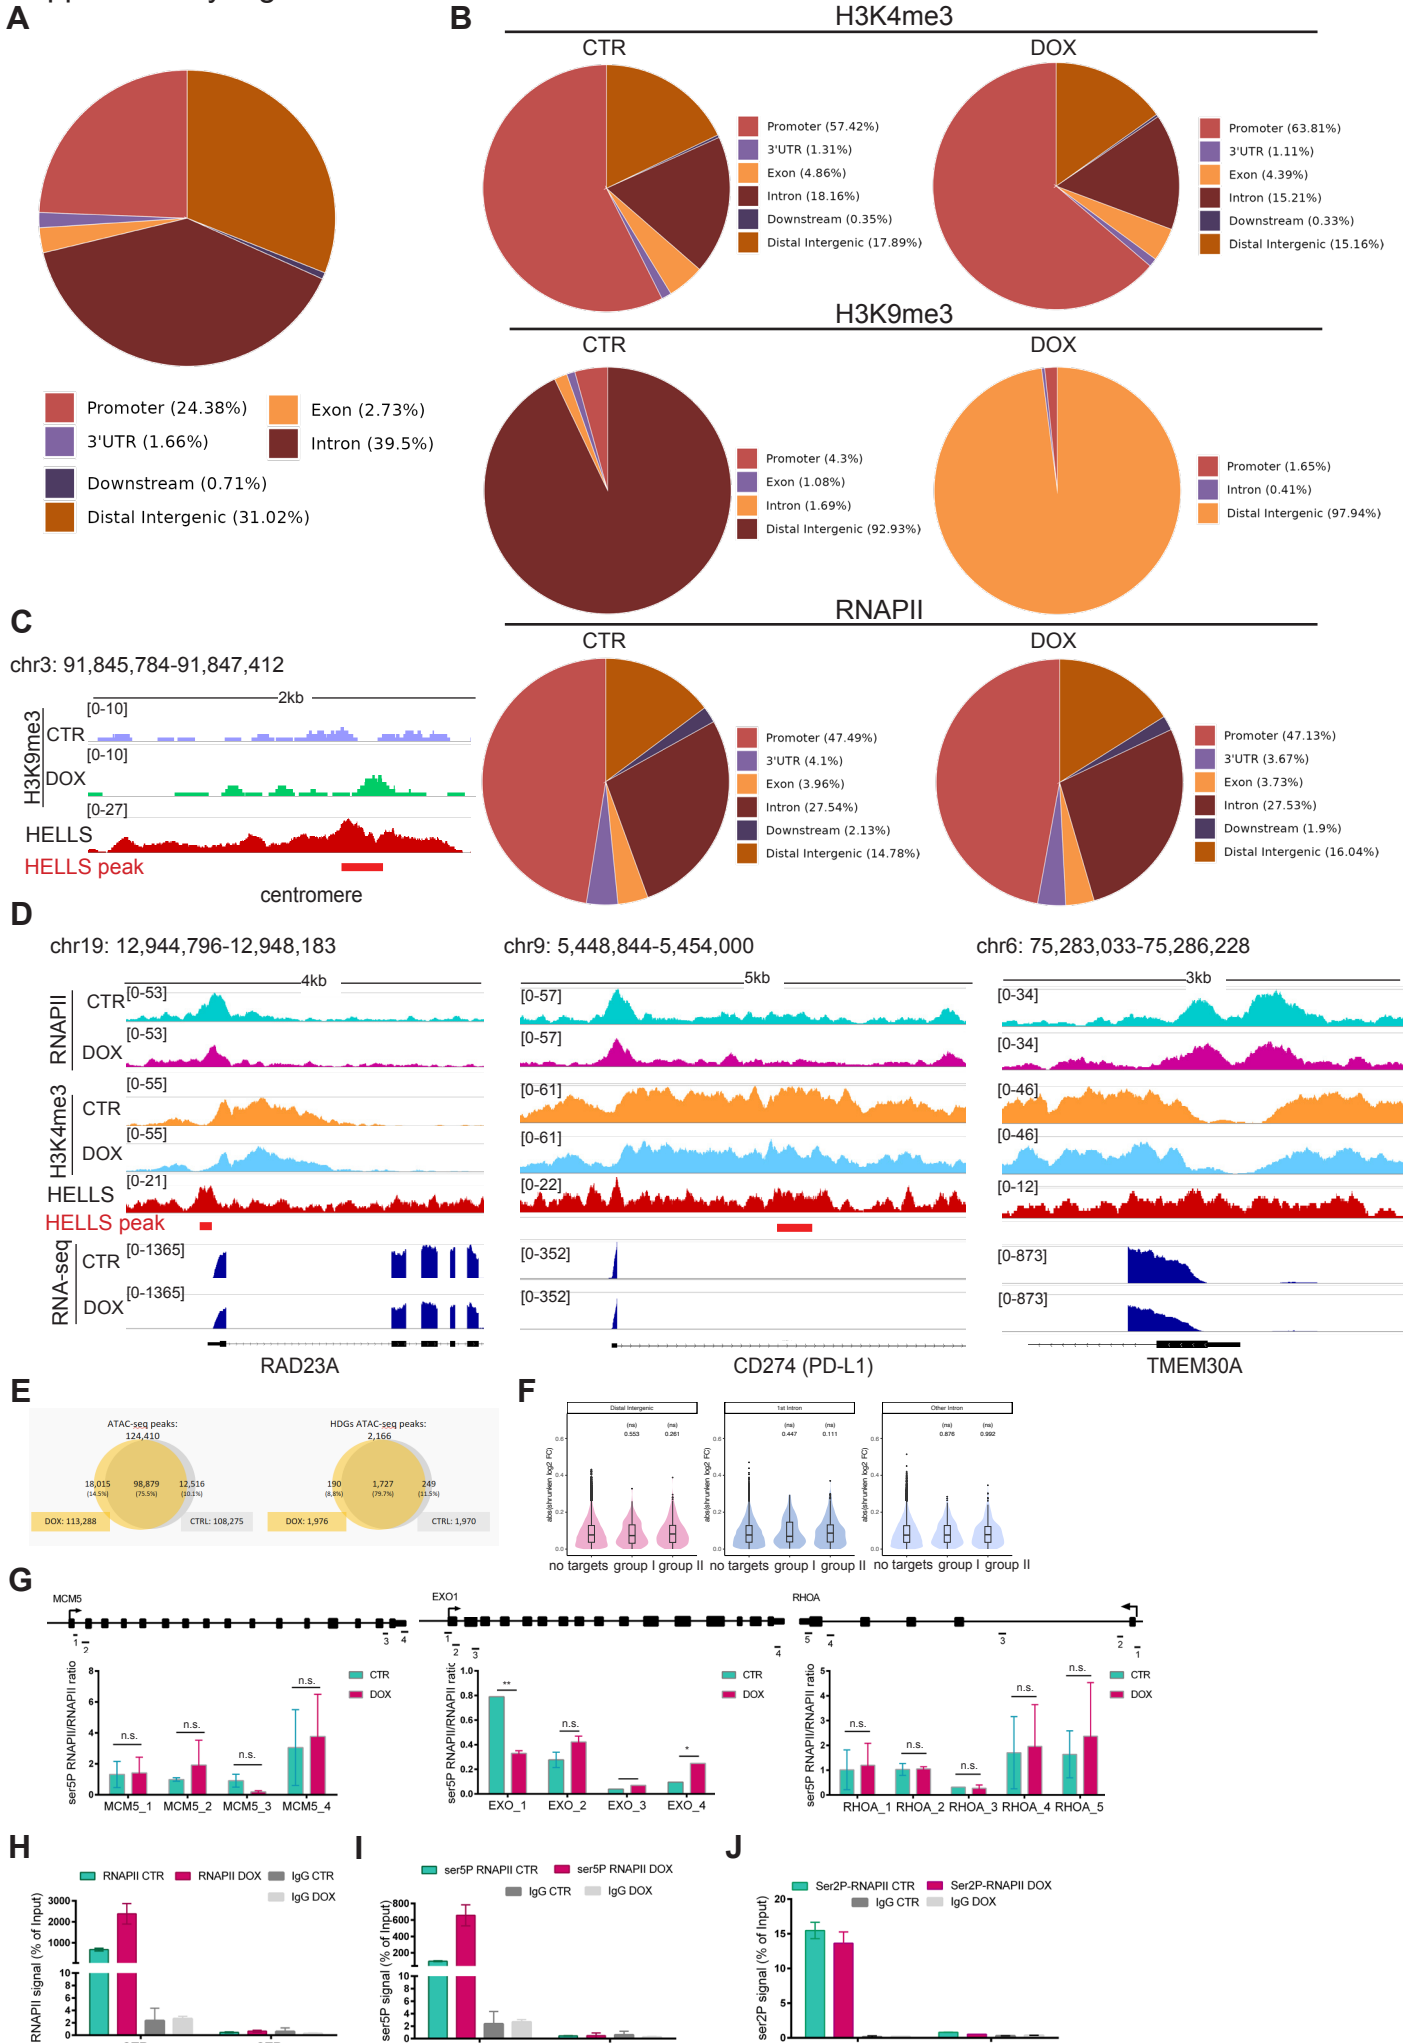

# Supplementary Figure S3

**A**

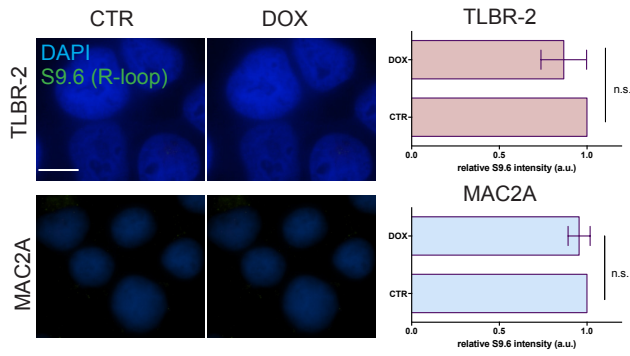

**B**

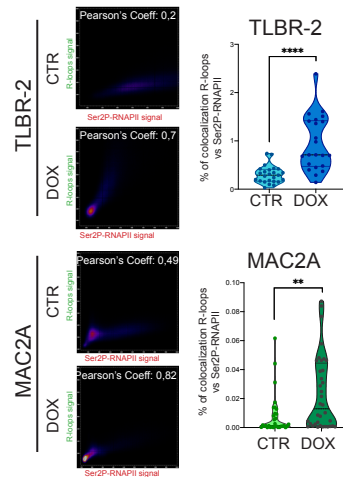

**C**

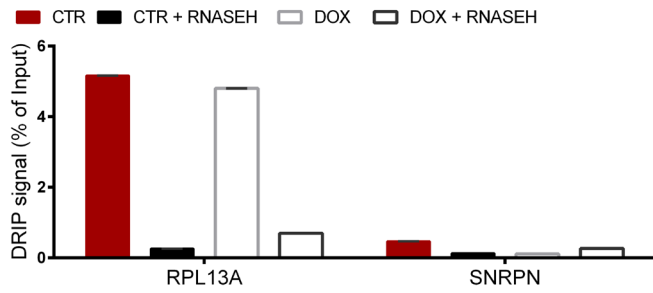

**D**

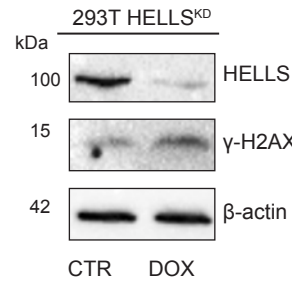

**E**

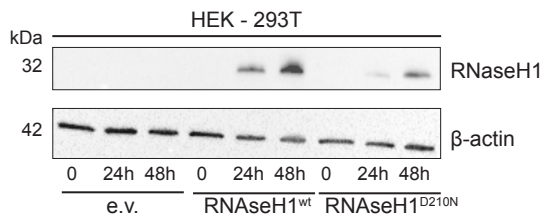

**F**

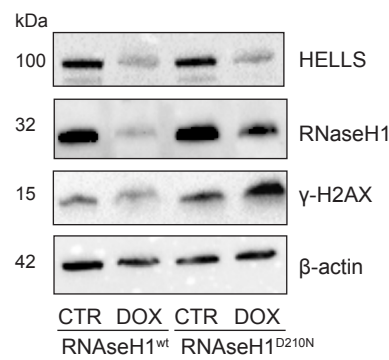

**G**

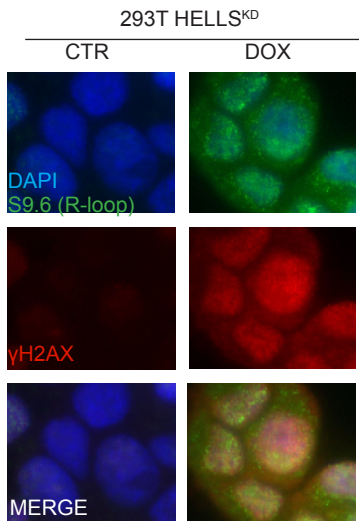

**H**

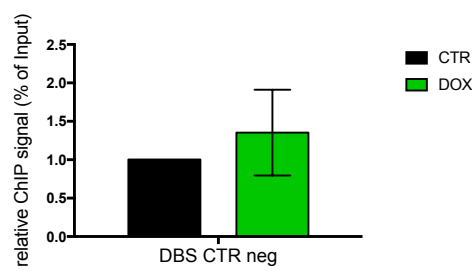

**I**

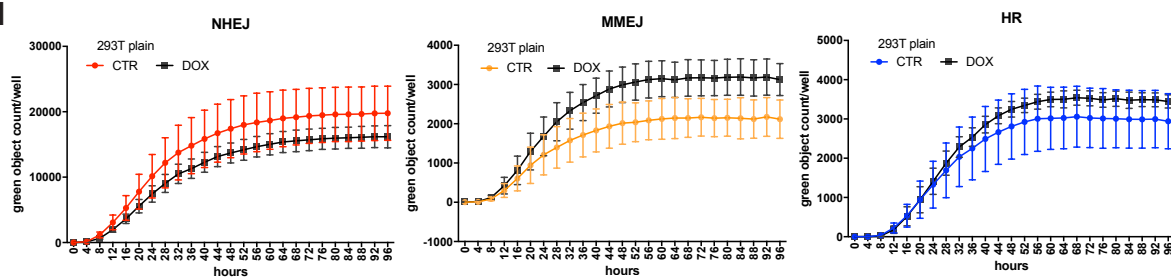



Supplementary Figure S4

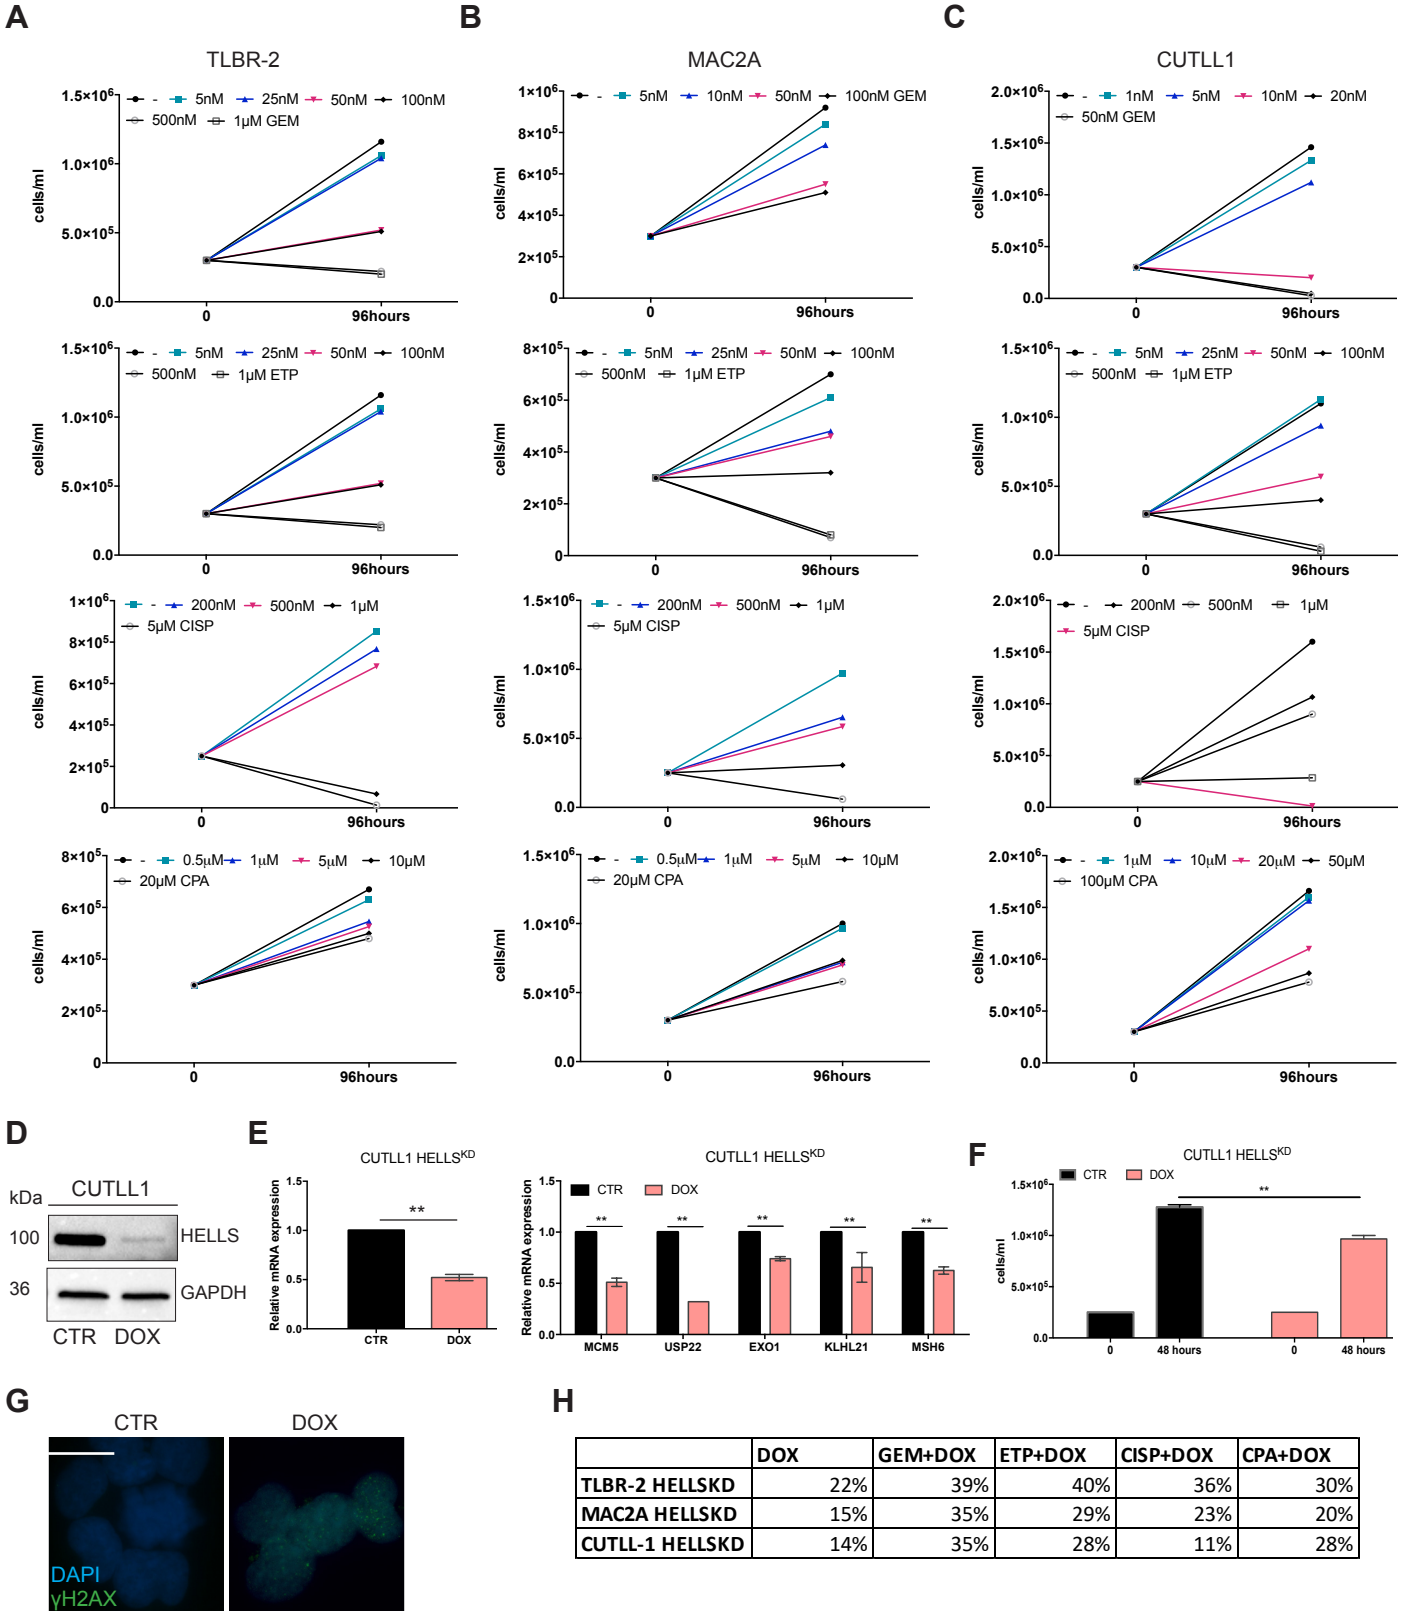

Supplement: gkae239_supplemental_file.pdf [file gkae239_supplemental_file.pdf]
